# Supplementary material
Source: publisher site journal article supplement (https://neobiota.pensoft.net/article/30392/download/suppl/32/)
Supplement: Supplementary file 1

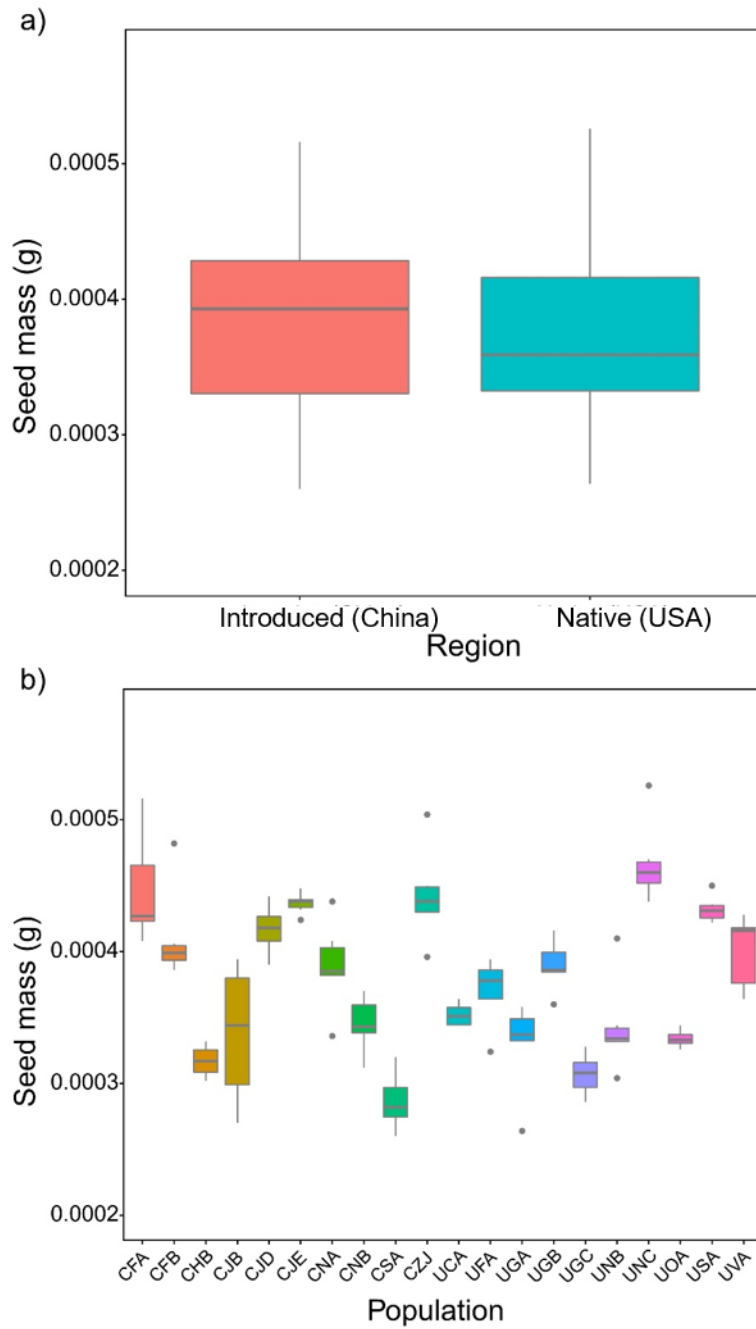

Fig. S1 a) Box plots of seed mass of native (USA) and introduced (China) populations of *P. virginica*; b) Box plots of seed mass of all individual populations.
